# Supplementary material for: Antagonistic roles between Nibbler and Hen1 modulate piRNA 3' ends in Drosophila
Source: Oxford University Press journal article supplement (doi:10.1242/dev.128116), 2015-01-01
Supplement: dev128116supp.pdf [file dev128116supp.pdf]

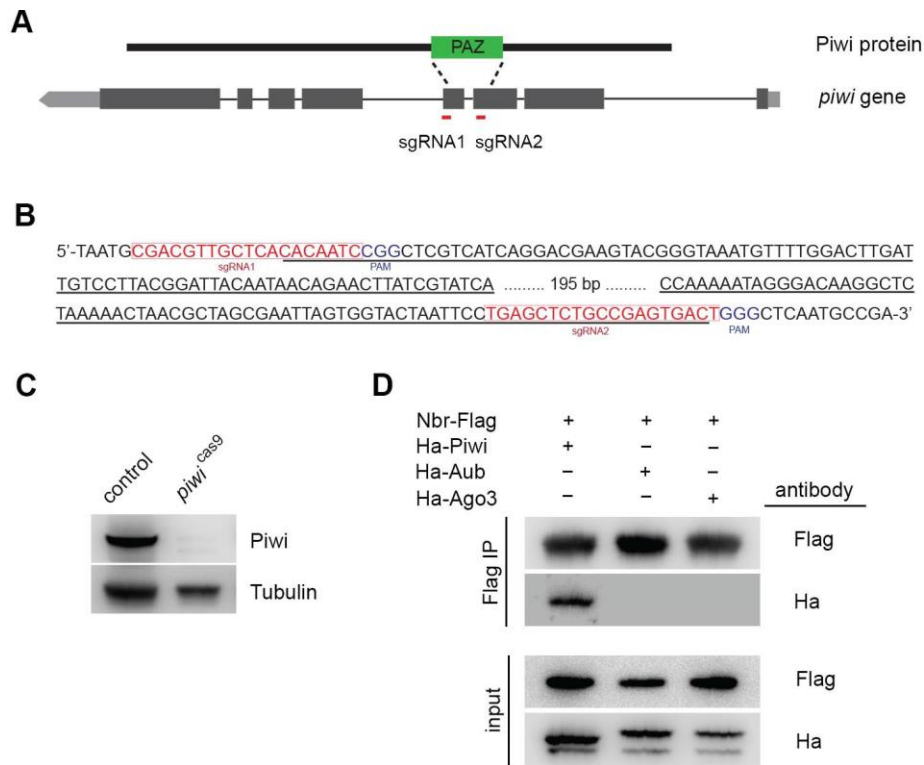

### Supplementary Figure 1. Nbr interacts with Piwi at the protein level.

A. Map of the *piwi* locus and guiding RNAs used to make *piwi*<sup>cas9</sup>. To make *piwi* loss-of-function allele based on the CRISPR/Cas9 method, sgRNA 1 and sgRNA 2, as illustrated in red lines, were used to induce site-specific deletion. The deleted region corresponds to the PAZ domain of Piwi.

B. *piwi*<sup>cas9</sup> carries a genomic deletion on the *piwi* gene. Part of *piwi* genomic sequence was shown to illustrate design features of CRISPR/Cas9-mediated *piwi* loss-of-function allele. sgRNAs and PAMs were highlighted at a nucleotide resolution. Nucleotides removed were underlined. Resulted *piwi* mutant flies were backcrossed to the control homogeneous background for five generations, to ensure background clearance.

C. Western blot confirms the specificity of Piwi antibody. Flies of indicated genotypes were assayed by western analysis using the polyclonal antibody for Piwi. Proteins were from ovaries. Genotypes: control (5905). *piwi*<sup>cas9</sup> (*piwi*<sup>cas9/cas9</sup>).

D. Nbr interacts with Piwi. In *Drosophila* S2 cells, co-IP experiments were conducted to determine if Nbr could interact with Piwi, Aub, and Ago3. Proteins were from S2 cells.

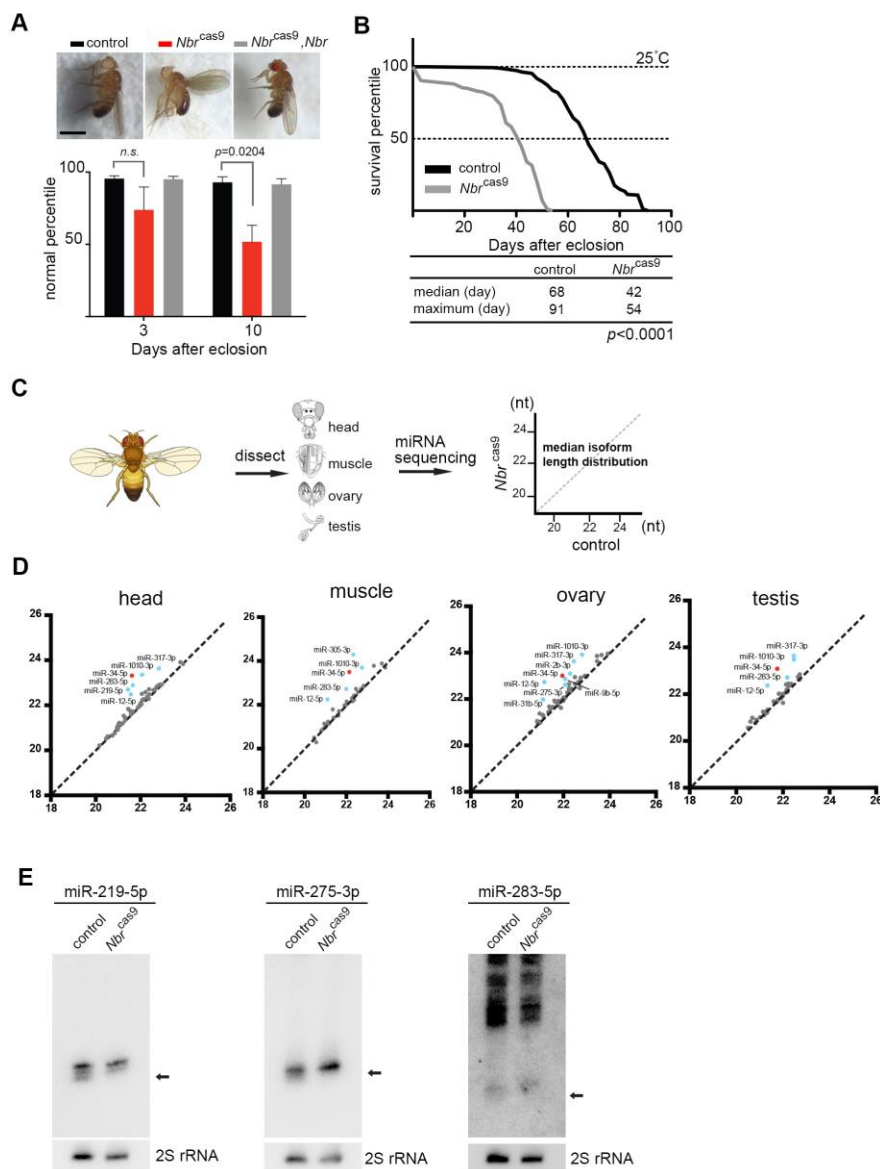

**Supplementary Figure 2. Loss of *Nbr* induces adult-onset, age-associated deficits, and miRNA trimming defects.**

A. Lack of *Nbr* triggers an adult-onset, progressive deficit. *Nbr<sup>cas9</sup>* flies exhibited expected adult emergence and gross morphology, suggesting normal development. Examination of adult animals revealed that, whereas controls had flat wing posture (top left panel), some *Nbr<sup>cas9</sup>* flies showed wing held-up (Top middle panel), a phenotype commonly linked with stress conditions. Upon slight age, the defect of wing postures became significantly enhanced, suggesting progressive deterioration. Flies were raised at 25°C. Wing held up phenotype: Mean  $\pm$  SD,  $n \geq 40$  flies

(student *t*-test). Genotypes: control (5905), *Nbr<sup>cas9</sup>* (*Nbr<sup>cas9/cas9</sup>*), *Nbr<sup>cas9</sup> Nbr* (pUAST-*Nbr*, *Nbr<sup>cas9/cas9</sup>*; GeneSwitch-*tubulin*-GAL4).

B. *Nbr<sup>cas9</sup>* flies (grey) had a sharp decline in adult viability compared to controls (black). Flies were raised at 25°C. Mean ± SE, n ≥ 200 flies for curve ( $p < 0.0001$ , log-rank test). Genotypes: 5905 and *Nbr<sup>cas9/cas9</sup>*.

C. A scheme to reveal miRNAs trimmed by *Nbr*. Using dissected adult tissues, we compared length for all miRNA reads between control and mutant. Our rationale lies at the fact that *Nbr* loss would accumulate higher isoforms due to defective trimming, thus tweaking the ratio among isoforms.

D. miRNAs with altered length in *Nbr<sup>cas9</sup>*. Scatterplots for indicated adult tissues were made based on miRNA length alterations between control and *Nbr<sup>cas9</sup>*. To highlight significantly lengthened miRNAs, we chose a cutoff of 0.5 nt, a mean length difference for particular miRNAs between control and mutant. In the graph, miR-34-5p was highlighted in red, while other miRNAs with a significantly lengthened size in *Nbr<sup>cas9</sup>* were shown in blue. Genotypes: 5905 (x-axis) and *Nbr<sup>cas9/cas9</sup>* (y-axis).

E. *Nbr*-substrate miRNAs show abolished lower isoforms in *Nbr<sup>cas9</sup>*. Small RNA northern was using RNA from heads (miR-219-5p, miR-283-5p) and ovaries (miR-275-3p). Arrow indicated trimmed isoforms in control, which became disappeared upon *Nbr* loss. 2S rRNA was used as a loading control. Genotypes as in B.

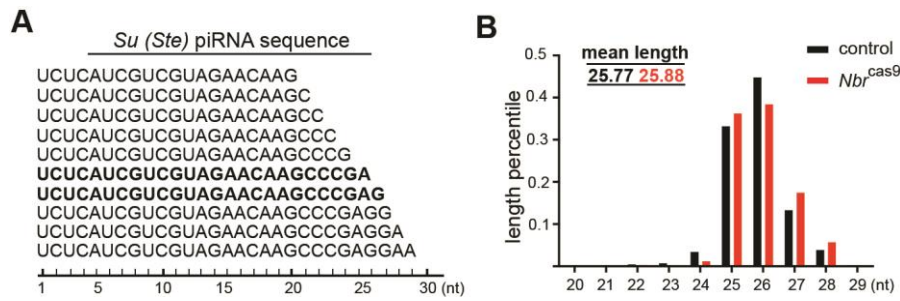

**Supplementary Figure 3. *Nbr* loss impacts sequence-specific piRNA**

A. In the deep sequencing result, a testicular piRNA, *Su(Ste)*, has a defined sequence, starting with a 5' uridine, with heterogeneous 3' ends of nested series. Main forms of 25 and 26 nt were shown in bold.

B. Length distribution graph indicates that *Su(Ste)* piRNAs accumulate more long forms in *Nbr<sup>cas9</sup>* than in control. RNAs were from testis. Genotypes: 5905 and *Nbr<sup>cas9/cas9</sup>*.

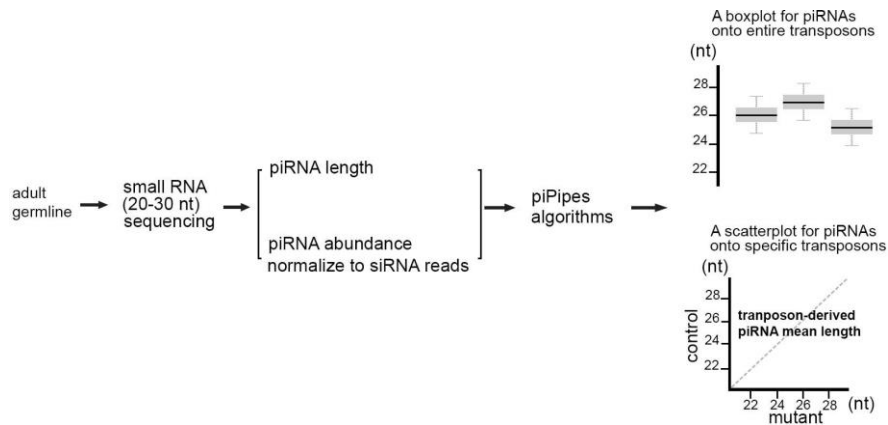

#### Supplementary Figure 4. Computational pipeline to analyze piRNAs

A dedicated algorithm called piPipes was used for piRNA analysis. Through piPipes, piRNAs mapped to 127 major *Drosophila* transposons were used. A mean value was calculated based on the length of piRNAs mapped to specific transposons. In boxplots, the horizontal bar (black) inside the box represented the median length of all 127 transposons, while the area of box (grey) represented the range of 25%-75% in the mean length of all 127 transposons. The whiskers indicated variability outside the upper and lower quartiles. Outliers beyond the whiskers were plotted as points. The use of boxplot allowed side-by-side comparison across multiple genotypes/samples. In scatterplots, individual transposons were shown as single dots (black), allowing comparison for individual transposons between two genotypes/samples.

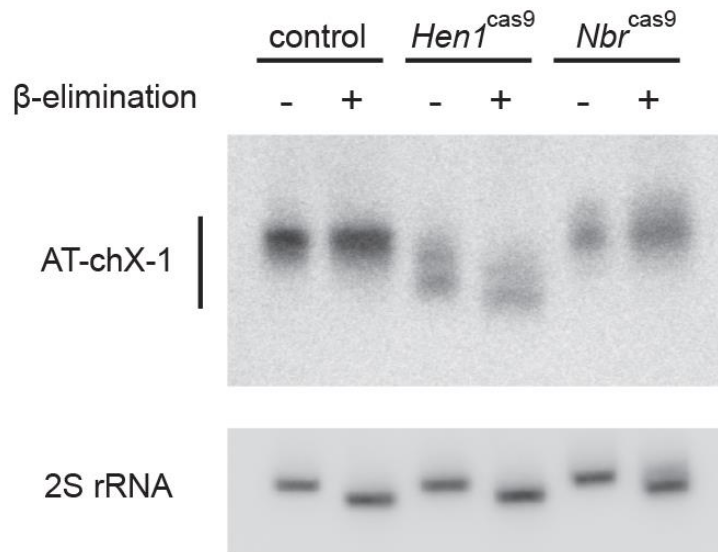

**Supplementary Figure 5. piRNAs remain 3' methylated in *Nbr* mutants.**

Small RNA northern blot revealed that, AT-chX-1 piRNAs were resistant to beta-elimination, in control and *Nbr<sup>cas9</sup>* mutants, but not in *Hen1<sup>cas9</sup>* mutants, suggesting that these piRNAs were 2'-*O*-methylated at 3' ends. Note that AT-chX-1 became shorter in *Hen1<sup>cas9</sup>* mutants compared to controls, reflecting enhanced trimming upon loss of *Hen1*. RNAs were from testis. Genotypes: control (5905), *Hen1<sup>cas9</sup>* (*Hen1<sup>cas9/cas9</sup>*), *Nbr<sup>cas9</sup>* (*Nbr<sup>cas9/cas9</sup>*).

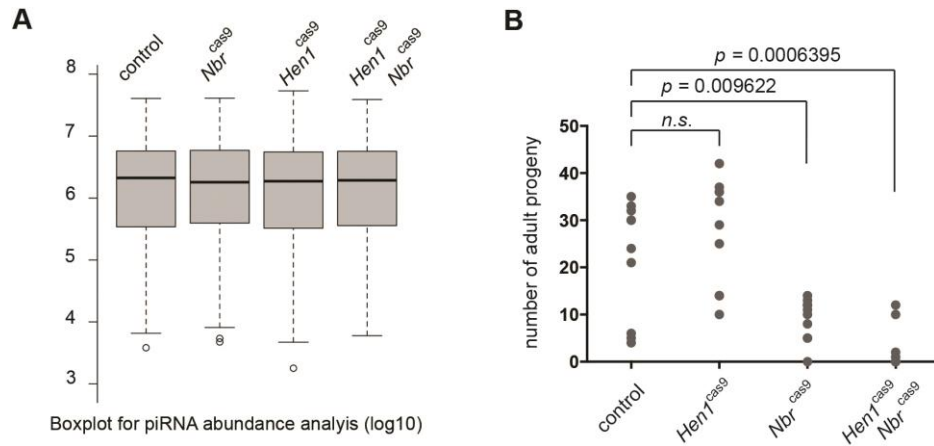

### Supplementary Figure 6. Characteristics of mutants.

A. Analysis of piRNA abundance. RNAs were from ovaries of 3d old animals with indicated genotypes. Boxplots for normalized read counts were shown as log10 value. (*Nbr*<sup>cas9</sup> vs. 5905:  $p = 0.05525$ ; *Hen1*<sup>cas9</sup> vs. 5905:  $p = 0.0003845$ ; *Nbr*<sup>cas9</sup>, *Hen1*<sup>cas9</sup> vs. 5905:  $p = 0.233$ ; Wilcoxon signed-rank test). Genotypes: control (5905), *Hen1*<sup>cas9</sup> (*Hen1*<sup>cas9/cas9</sup>), *Nbr*<sup>cas9</sup> (*Nbr*<sup>cas9/cas9</sup>) and double mutant.

B. Flies without *Nbr* show reduced female fecundity. Fertility test revealed that whereas *Hen1*<sup>cas9</sup> mutants had normal fertility, *Nbr*<sup>cas9</sup> mutants and *Hen1*<sup>cas9</sup> *Nbr*<sup>cas9</sup> double mutants demonstrated a significant decrease in female fecundity.  $n=10$  independent tests, (student *t*-test with Welch correction). Genotypes: control (5905), *Hen1*<sup>cas9</sup> (*Hen1*<sup>cas9/cas9</sup>), *Nbr*<sup>cas9</sup> (*Nbr*<sup>cas9/cas9</sup>) and double mutant.

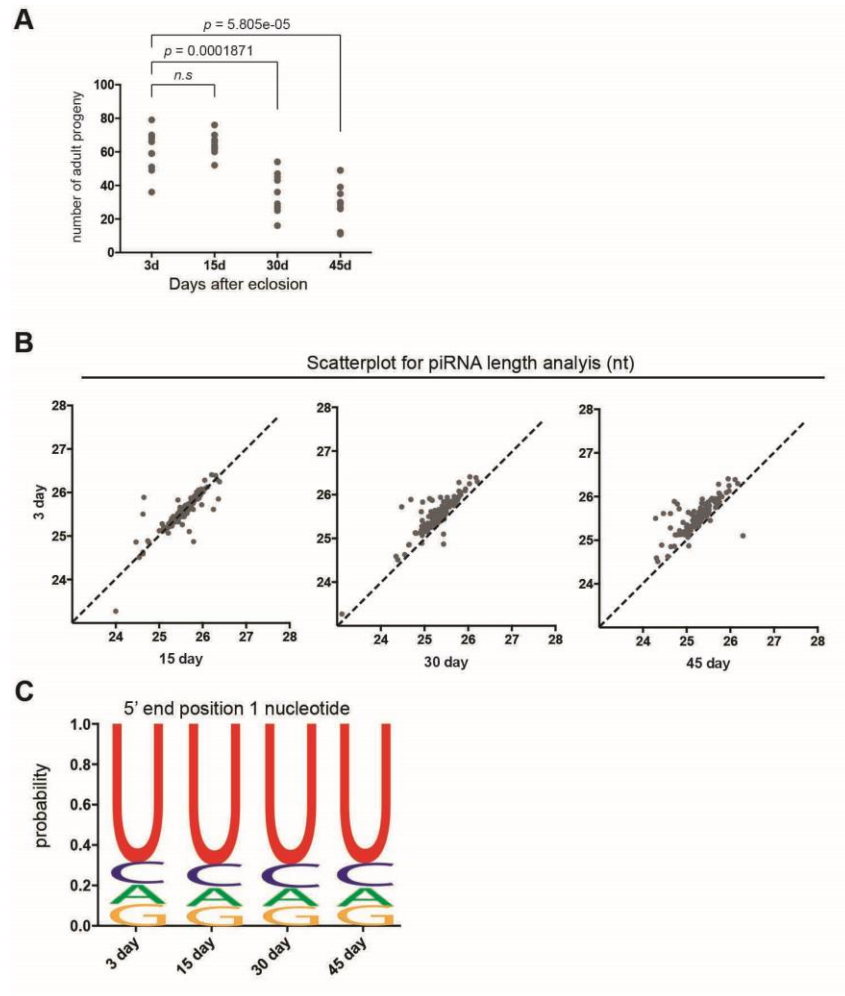

**Supplementary Figure 7. With age, piRNAs become progressively shortened from 3' ends.**

A. Female fecundity shows age-associated decline.  $n=10$  independent tests, (student  $t$ -test with Welch correction). Genotypes: control (5905).

B. piRNAs become progressively shortened with age. Scatterplots for piRNA length analysis revealed age-dependent length changes. (15d vs. 3d:  $p = 0.001371$ ; 30d vs. 3d:  $p < 2.2 \times 10^{-16}$ ; 45d vs. 3d:  $p < 2.2 \times 10^{-16}$ ; Wilcoxon signed-rank test). RNAs were from ovaries of indicated ages. Genotype as in A.

C. piRNAs in adult flies with indicated ages show the same bias for 5' uridine (1U). Genotype as in A.



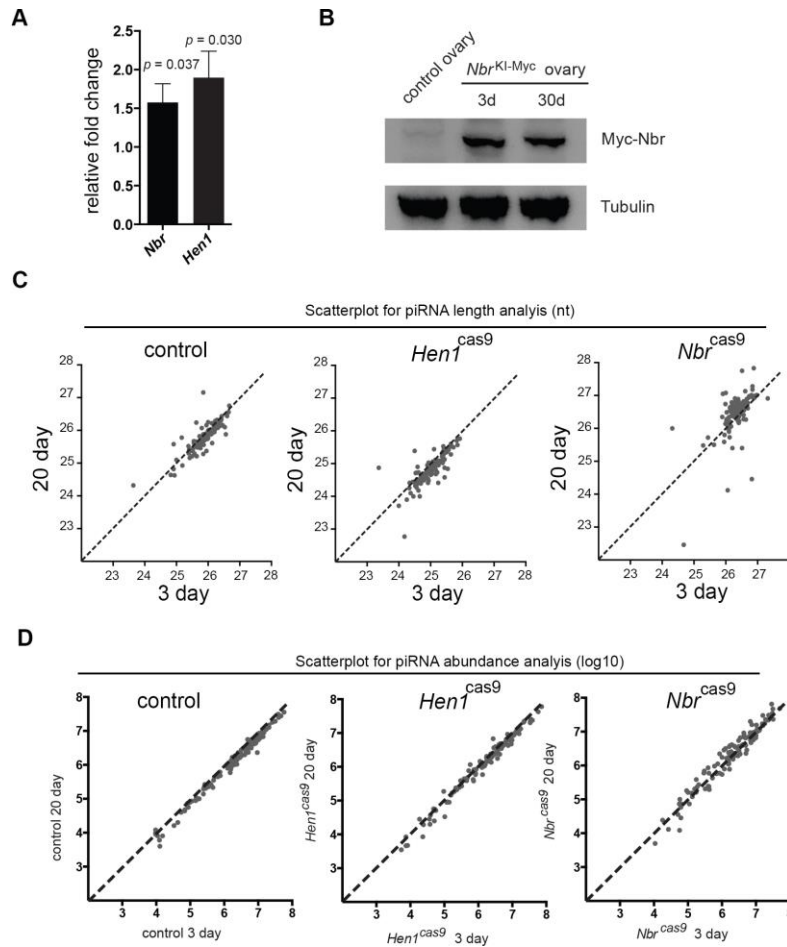

**Supplementary Figure 8. *Nbr* contributes to the age-modulated piRNA profile.**

A. *Nbr* and *Hen1* show increased expression level with age. qRT-PCR was used. RNAs were from ovaries at 3d or 30d. Mean  $\pm$  SD,  $n = 3$  independent experiments (student *t*-test). Genotype (5905).

B. *Nbr* proteins show unchanged levels with age. Proteins were from ovaries of indicated age. Genotypes: control (5905). *Nbr<sup>KI-Myc</sup>* (*Nbr<sup>KI-Myc/KI-Myc</sup>*).

C. *Nbr* contributes to age-modulation of piRNAs. Scatterplots showed that, with slight aging, piRNAs became shortened in control (left panel) and *Hen1<sup>cas9</sup>* (middle panel), but not in *Nbr<sup>cas9</sup>* (right panel). RNAs were from ovaries of indicated genotypes. (5905: 20d vs. 3d:  $p = 2.948 \times 10^{-10}$ ; *Hen1<sup>cas9</sup>*: 20d vs. 3d:  $p = 2.634 \times 10^{-15}$ ; *Nbr<sup>cas9</sup>*: 20d vs. 3d:  $p = 7.098 \times 10^{-8}$ ; Wilcoxon signed rank test). Genotypes: control (5905), *Hen1<sup>cas9</sup>* (*Hen1<sup>cas9/cas9</sup>*), *Nbr<sup>cas9</sup>* (*Nbr<sup>cas9/cas9</sup>*).

D. *Nbr* modulates piRNA abundance with age. Scatterplots showed a trend in that, with slight aging, piRNA levels became decreased in control (left panel) and *HenI*<sup>cas9</sup> (middle panel), but not in *Nbr*<sup>cas9</sup> (right panel). RNAs were from ovaries of indicated genotypes. (5905: 20d vs. 3d:  $p < 2.2 \times 10^{-16}$ ; *HenI*<sup>cas9</sup>: 20d vs. 3d:  $p = 8.454 \times 10^{-11}$ ; *Nbr*<sup>cas9</sup>: 20d vs. 3d:  $p = 0.1271$ ; Wilcoxon signed-rank test).

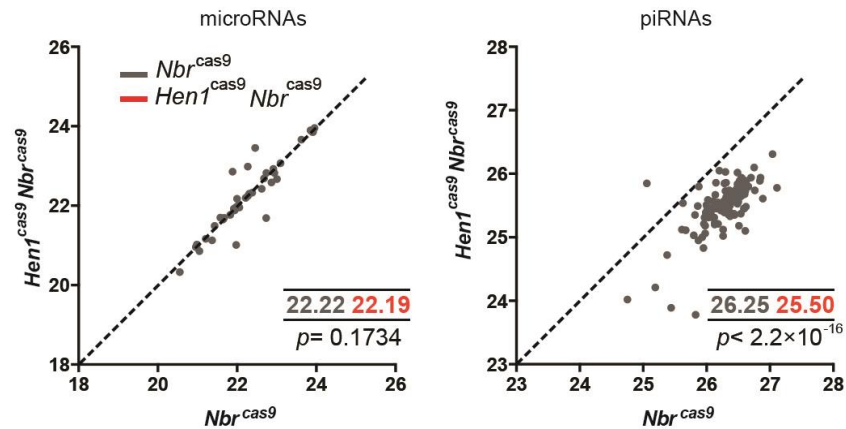

**Supplementary Figure 9. piRNAs may be trimmed by an unknown “trimmer”.**

Sequence analysis and comparison revealed piRNAs, but not miRNAs, became further shortened in *Hen1<sup>cas9</sup> Nbr<sup>cas9</sup>* double mutants compared to *Nbr<sup>cas9</sup>* single mutants. This data may implicate the effect of a second “unknown” trimmer that modulates piRNA sequence. RNAs were from ovaries of indicated genotypes. Wilcoxon rank sum test.

### Supplementary Table 1. miRNAs trimmed by Nbr

This table summarizes a list of miRNAs that are trimmed by Nbr at a tissue resolution. For miRNAs with relatively high expression, small RNA northern was used for validation, together with small RNA sequencing data.

|                | tissue type              | validation                     |
|----------------|--------------------------|--------------------------------|
| miR-2b-3p      | ovary                    | sequencing                     |
| miR-3-3p       | whole body               | sequencing; small RNA northern |
| miR-7-5p       | whole body               | sequencing; small RNA northern |
| miR-9b-5p      | ovary                    | sequencing                     |
| miR-10-3p      | whole body               | sequencing; small RNA northern |
| miR-11-3p      | whole body               | sequencing                     |
| miR-12-3p      | head;muscle;testis;ovary | sequencing; small RNA northern |
| miR-31b-5p     | ovary                    | sequencing                     |
| miR-34-5p      | head;muscle;testis;ovary | sequencing; small RNA northern |
| miR-100-5p     | whole body               | sequencing                     |
| miR-190-5p     | whole body               | sequencing; small RNA northern |
| miR-219-5p     | head                     | sequencing; small RNA northern |
| miR-263a-5p    | whole body               | sequencing                     |
| miR-263b-5p    | whole body               | sequencing                     |
| miR-275-3p     | ovary                    | sequencing; small RNA northern |
| miR-281-1/2-5p | whole body               | sequencing                     |
| miR-283-5p     | head;muscle;testis;ovary | sequencing; small RNA northern |
| miR-305-5p     | muscle                   | sequencing; small RNA northern |
| miR-317-3p     | head;ovary;testis        | sequencing; small RNA northern |
| miR-1010-3p    | head;muscle;ovary;testis | sequencing                     |

**Supplementary Table 2. Mean length for piRNA lengths in different mutants**

Summary for major transposons in the fly genome was listed. Transposons further analyzed by qRT-PCR were in red.

|                       | control | <i>Nbr</i> <sup>cas9</sup> | <i>Hen1</i> <sup>cas9</sup> | <i>Hen1</i> <sup>cas9</sup> <i>Nbr</i> <sup>cas9</sup> |
|-----------------------|---------|----------------------------|-----------------------------|--------------------------------------------------------|
| <i>frogger</i>        | 25.34   | 27.11                      | 25.48                       | 25.78                                                  |
| <i>aurora_element</i> | 25.33   | 26.54                      | 23.96                       | 25.37                                                  |
| <i>R1_2</i>           | 25.38   | 26.5                       | 25.35                       | 25.56                                                  |
| <i>jockey2</i>        | 24.75   | 25.86                      | 24.38                       | 25.49                                                  |
| <i>X_element</i>      | 25.41   | 26.49                      | 24.44                       | 25.53                                                  |
| <i>jockey</i>         | 24.89   | 25.93                      | 24.23                       | 25                                                     |
| G6                    | 25.31   | 26.3                       | 24.6                        | 25.54                                                  |
| GATE                  | 25.38   | 26.37                      | 24.73                       | 25.66                                                  |
| <i>Tc1_2</i>          | 25.91   | 26.84                      | 24.92                       | 25.89                                                  |
| <i>transib1</i>       | 25.45   | 26.31                      | 24.87                       | 25.86                                                  |
| <i>R1A1-element</i>   | 25.68   | 26.54                      | 24.41                       | 25.65                                                  |
| <i>Rt1a</i>           | 25.81   | 26.66                      | 24.7                        | 25.8                                                   |
| <i>baggins</i>        | 25.86   | 26.6                       | 25.04                       | 25.86                                                  |
| <i>Max-element</i>    | 25.87   | 26.6                       | 24.67                       | 25.68                                                  |
| <i>stellateHet</i>    | 25.76   | 26.49                      | 24.98                       | 25.61                                                  |
| G2                    | 26.03   | 26.75                      | 24.92                       | 26.1                                                   |
| BS3                   | 25.9    | 26.61                      | 24.92                       | 25.1                                                   |
| <i>Rt1b</i>           | 25.65   | 26.35                      | 24.46                       | 25.59                                                  |
| 17                    | 25.64   | 26.33                      | 25.07                       | 25.71                                                  |
| <i>stellate</i>       | 25.95   | 26.62                      | 24.91                       | 25.48                                                  |
| <i>HeT-A</i>          | 25.49   | 26.13                      | 24.34                       | 25.22                                                  |
| <i>gypsy8</i>         | 25.92   | 26.55                      | 25.67                       | 25.94                                                  |
| <i>gypsy7</i>         | 25.97   | 26.59                      | 24.58                       | 25.45                                                  |
| <i>suffix</i>         | 24.79   | 25.38                      | 24.67                       | 24.72                                                  |
| <i>Rt1c</i>           | 25.78   | 26.37                      | 24.97                       | 25.5                                                   |

|                   |       |       |       |       |
|-------------------|-------|-------|-------|-------|
| <i>opus</i>       | 25.88 | 26.47 | 24.99 | 25.75 |
| <i>Doc</i>        | 25.38 | 25.96 | 24.36 | 25.21 |
| <i>Fw3</i>        | 25.41 | 25.99 | 24.59 | 25.34 |
| <i>suste</i>      | 25.44 | 26.01 | 24.59 | 25.46 |
| <i>mdg3</i>       | 25.5  | 26.07 | 24.53 | 25.39 |
| <i>Oswaldo</i>    | 26.02 | 26.59 | 24.36 | 25.45 |
| <i>diver2</i>     | 25.56 | 26.12 | 24.84 | 25.31 |
| <i>G3</i>         | 25.67 | 26.23 | 25.06 | 25.42 |
| <i>roo</i>        | 25.94 | 26.5  | 25.18 | 25.69 |
| <i>looper1</i>    | 25.49 | 26.02 | 25.06 | 25.33 |
| <i>INE_1</i>      | 25.58 | 26.11 | 24.82 | 25.3  |
| <i>S_element</i>  | 25.75 | 26.28 | 24.94 | 25.85 |
| <i>1731</i>       | 25.77 | 26.3  | 24.81 | 25.45 |
| <i>Fw2</i>        | 25.46 | 25.98 | 25.07 | 25.06 |
| <i>Doc3_eleme</i> | 25.56 | 26.08 | 24.75 | 25.43 |
| <i>G_element</i>  | 25.84 | 26.36 | 24.65 | 25.74 |
| <i>accord</i>     | 25.47 | 25.98 | 24.71 | 25.18 |
| <i>TAHRE</i>      | 25.69 | 26.2  | 24.74 | 26.05 |
| <i>BS</i>         | 25.77 | 26.27 | 24.97 | 25.57 |
| <i>invader3</i>   | 25.79 | 26.29 | 24.97 | 25.5  |
| <i>G4</i>         | 25.79 | 26.29 | 25.01 | 25.43 |
| <i>R2_element</i> | 25.89 | 26.39 | 25.25 | 25.62 |
| <i>1360</i>       | 25.93 | 26.43 | 24.89 | 25.6  |
| <i>Porto1</i>     | 25.67 | 26.16 | 25.21 | 25.45 |
| <i>pogo</i>       | 25.7  | 26.18 | 25.12 | 25.21 |
| <i>F_element</i>  | 25.51 | 25.99 | 24.49 | 25.39 |
| <i>Ivk</i>        | 25.83 | 26.3  | 24.97 | 25.73 |
| <i>Tirant</i>     | 25.96 | 26.43 | 25.29 | 25.37 |

|                   |       |       |       |       |
|-------------------|-------|-------|-------|-------|
| TART_C_TAR        | 25.72 | 26.18 | 24.65 | 25.55 |
| <i>accord2</i>    | 25.93 | 26.39 | 25.18 | 25.62 |
| <i>transib2</i>   | 26.24 | 26.7  | 25.45 | 25.94 |
| <i>l-element</i>  | 25.78 | 26.24 | 24.72 | 25.47 |
| <i>Doc2_eleme</i> | 25.72 | 26.17 | 24.92 | 25.48 |
| <i>copia</i>      | 26.1  | 26.55 | 24.57 | 25.71 |
| <i>HMS_Beagle</i> | 26.01 | 26.44 | 25.11 | 25.59 |
| <i>mst40</i>      | 25.73 | 26.15 | 25.13 | 25.86 |
| <i>Tc1</i>        | 25.54 | 25.95 | 25.43 | 24.83 |
| <i>3S18</i>       | 25.69 | 26.1  | 24.6  | 25.57 |
| <i>gypsy12</i>    | 25.94 | 26.35 | 25.03 | 25.58 |
| <i>rooA</i>       | 26.03 | 26.44 | 25.16 | 25.67 |
| <i>invader2</i>   | 26.12 | 26.53 | 25.12 | 25.81 |
| <i>diver</i>      | 25.63 | 26.02 | 24.76 | 25.59 |
| <i>McClintock</i> | 25.91 | 26.3  | 25.3  | 26.03 |
| <i>gypsy3</i>     | 25.95 | 26.34 | 24.85 | 25.36 |
| <i>HMS_Beagle</i> | 26.13 | 26.51 | 24.74 | 25.18 |
| <i>Stalker</i>    | 26.23 | 26.61 | 25.38 | 25.73 |
| <i>invader4</i>   | 26.53 | 26.89 | 24.54 | 25.61 |
| <i>G5A</i>        | 25.78 | 26.13 | 24.37 | 25.2  |
| <i>Cr1a</i>       | 26.17 | 26.52 | 25.05 | 25.89 |
| <i>Stalker4</i>   | 26.21 | 26.56 | 25.35 | 25.66 |
| <i>NOF</i>        | 25.77 | 26.11 | 25.08 | 25.48 |
| <i>hobo</i>       | 26.14 | 26.48 | 25.28 | 25.77 |
| <i>gypsy4</i>     | 26.15 | 26.49 | 25.14 | 25.67 |
| <i>Stalker2</i>   | 26.32 | 26.66 | 25.48 | 25.8  |
| <i>invader1</i>   | 25.96 | 26.29 | 24.77 | 25.51 |
| <i>Dm88</i>       | 26.3  | 26.63 | 25.16 | 25.89 |

|                  |       |       |       |       |
|------------------|-------|-------|-------|-------|
| <i>Q_element</i> | 26.71 | 27.04 | 25.45 | 26.31 |
| <i>springer</i>  | 25.98 | 26.3  | 24.96 | 25.39 |
| <i>gtwin</i>     | 26.55 | 26.85 | 25.85 | 25.94 |
| <i>blood</i>     | 26.06 | 26.35 | 25.05 | 25.43 |
| <i>Helena</i>    | 26.21 | 26.5  | 25.37 | 25.67 |
| 297              | 26.29 | 26.58 | 25.31 | 25.75 |
| TARTA            | 25.86 | 26.14 | 25.32 | 25.67 |
| <i>gypsy2</i>    | 26.14 | 26.42 | 25.51 | 25.72 |
| <i>Idefix</i>    | 26.15 | 26.43 | 25.29 | 25.57 |
| <i>mdg1</i>      | 26.16 | 26.44 | 25.17 | 25.35 |
| <i>Circe</i>     | 26.03 | 26.31 | 25.13 | 25.63 |
| <i>gypsy10</i>   | 26.26 | 26.53 | 25.57 | 25.64 |
| <i>gypsy9</i>    | 26    | 26.26 | 24.09 | 25.12 |
| <i>ZAM</i>       | 26.03 | 26.28 | 25.21 | 25.39 |
| <i>Tabor</i>     | 26.19 | 26.44 | 25.44 | 25.58 |
| <i>micropia</i>  | 26.52 | 26.76 | 25.19 | 25.74 |
| 412              | 26.08 | 26.31 | 25.42 | 25.58 |
| <i>gypsy</i>     | 26.08 | 26.3  | 25.39 | 25.58 |
| <i>gypsy6</i>    | 24.99 | 25.19 | 24.17 | 24.21 |
| <i>rover</i>     | 25.61 | 25.8  | 24.74 | 25.03 |
| <i>fllea</i>     | 25.84 | 26.03 | 24.9  | 25.46 |
| G5               | 25.86 | 26.05 | 24.7  | 25.37 |
| <i>Transpac</i>  | 26.18 | 26.37 | 24.88 | 25.33 |
| <i>hopper2</i>   | 25.26 | 25.44 | 23.53 | 23.89 |
| <i>Stalker3</i>  | 26.38 | 26.56 | 25.59 | 25.93 |
| S2               | 25.86 | 26.03 | 24.86 | 25.31 |
| <i>Burdock</i>   | 25.84 | 26    | 24.6  | 25.51 |
| <i>Quasimodo</i> | 26.1  | 26.23 | 25.11 | 25.47 |



|                     |       |       |       |       |
|---------------------|-------|-------|-------|-------|
| <i>gypsy11</i>      | 26.37 | 26.49 | 25.28 | 25.84 |
| <i>mariner2</i>     | 25.54 | 25.63 | 24.55 | 25.54 |
| <i>hopper</i>       | 25.75 | 25.82 | 24.46 | 25.35 |
| <i>gypsy5</i>       | 26.42 | 26.49 | 25.55 | 25.71 |
| <i>Bari1</i>        | 25.55 | 25.61 | 24.68 | 25.12 |
| <i>Doc4_element</i> | 25.82 | 25.87 | 24.55 | 24.95 |
| <i>transib3</i>     | 26.23 | 26.26 | 24.53 | 25.02 |
| <i>FB</i>           | 24.74 | 24.75 | 24.24 | 24.02 |
| <i>HB</i>           | 26    | 25.97 | 25.5  | 25.31 |
| <i>Juan</i>         | 26.53 | 26.49 | 25.7  | 26.02 |
| <i>G7</i>           | 26.02 | 25.88 | 24.66 | 25.8  |
| <i>invader5</i>     | 25.96 | 25.67 | 25.14 | 25.11 |
| <i>Tom1</i>         | 25.92 | 25.06 | 25.69 | 25.85 |
| <i>transib4</i>     | 26.14 | 22.75 | 24.72 | 25.4  |

**Supplementary Table 3. piRNA abundance in different mutants**

Transposons further analyzed by qRT-PCR were in red.

|                     | control  | <i>Nbr</i> <sup>cas9</sup> | <i>Hen1</i> <sup>cas9</sup> | <i>Hen1</i> <sup>cas9</sup> <i>Nbr</i> <sup>cas9</sup> |
|---------------------|----------|----------------------------|-----------------------------|--------------------------------------------------------|
| <i>R1A1-element</i> | 40555792 | 40918873                   | 53738491                    | 38956250                                               |
| <i>roo</i>          | 34546733 | 35677729                   | 28894838                    | 35213717                                               |
| <i>Rt1b</i>         | 29893067 | 25404192                   | 24329941                    | 23540594                                               |
| <i>GATE</i>         | 29765871 | 35781378                   | 37764822                    | 36524184                                               |
| <i>Max-element</i>  | 23878570 | 25915874                   | 24995514                    | 25651025                                               |
| <i>gtwin</i>        | 18375221 | 18757781                   | 15419291                    | 14571126                                               |
| <i>F_element</i>    | 15829868 | 19596311                   | 13607558                    | 21286131                                               |
| <i>412</i>          | 13198049 | 15899266                   | 15254488                    | 17610607                                               |
| <i>Doc</i>          | 12467788 | 14848681                   | 9749282                     | 12410250                                               |
| <i>X_element</i>    | 12327023 | 10212972                   | 10113076                    | 12670588                                               |
| <i>Stalker</i>      | 11054786 | 13311987                   | 10426252                    | 11011733                                               |
| <i>Rt1a</i>         | 10994816 | 16169664                   | 11452185                    | 14926210                                               |
| <i>Stalker4</i>     | 10673738 | 13019675                   | 10454206                    | 11022726                                               |
| <i>Doc3_element</i> | 9375582  | 10887232                   | 6993792                     | 7804955                                                |
| <i>invader4</i>     | 9235976  | 5773847                    | 7579986                     | 6632277                                                |
| <i>HeT-A</i>        | 9183285  | 12781578                   | 9122531                     | 8472331                                                |
| <i>gypsy12</i>      | 9083661  | 10678551                   | 11400864                    | 10570090                                               |
| <i>297</i>          | 8993479  | 28827042                   | 27198270                    | 34197061                                               |
| <i>baggins</i>      | 8694890  | 7710230                    | 6498647                     | 6779597                                                |
| <i>G_element</i>    | 8311368  | 8700602                    | 6584400                     | 6133818                                                |
| <i>mdg1</i>         | 8243544  | 9424532                    | 9163660                     | 9354462                                                |
| <i>opus</i>         | 7499437  | 5915539                    | 9016755                     | 9486698                                                |
| <i>gypsy4</i>       | 7489508  | 7631847                    | 5406112                     | 6786272                                                |
| <i>blood</i>        | 7362489  | 6970538                    | 6238376                     | 7016394                                                |
| <i>gypsy6</i>       | 7139684  | 7690015                    | 6041633                     | 6593523                                                |
| <i>G2</i>           | 7063689  | 5572263                    | 5550461                     | 5677810                                                |
| <i>Stalker2</i>     | 6868471  | 8201728                    | 6108261                     | 6372059                                                |

|                       |         |         |         |         |
|-----------------------|---------|---------|---------|---------|
| <i>rooA</i>           | 6690092 | 9158656 | 5677760 | 8500340 |
| <i>Cr1a</i>           | 6662661 | 8449936 | 8062565 | 8541705 |
| <i>Circe</i>          | 6311811 | 6415745 | 6729623 | 5672003 |
| <i>TART_C_TAR</i>     | 5917997 | 5977014 | 6808865 | 6027270 |
| <i>gypsy</i>          | 5749546 | 5892751 | 4519596 | 4736007 |
| <i>springer</i>       | 5716495 | 5417446 | 4028415 | 4104576 |
| <i>TAHRE</i>          | 5466748 | 7620330 | 5754409 | 4856857 |
| <i>gypsy2</i>         | 5430234 | 5767966 | 5318034 | 5257971 |
| <i>flea</i>           | 5287676 | 1147693 | 7972798 | 1225206 |
| <i>1731</i>           | 5230114 | 3279110 | 2961506 | 3748954 |
| <i>gypsy10</i>        | 5122992 | 5046472 | 3982439 | 4931326 |
| <i>Tabor</i>          | 4764209 | 6048619 | 4705033 | 5737882 |
| <i>HMS_Beagle</i>     | 4541105 | 3387774 | 2720143 | 2966920 |
| <i>Quasimodo</i>      | 4414961 | 4078264 | 3124211 | 3514222 |
| <i>BS</i>             | 4390388 | 4191312 | 2563274 | 4923770 |
| <i>Idefix</i>         | 4228648 | 4258130 | 3982744 | 4772878 |
| <i>HMS_Beagle</i>     | 4224771 | 2270861 | 2103363 | 2171112 |
| <i>3S18</i>           | 4188719 | 5760739 | 3948456 | 5686902 |
| <i>aurora_element</i> | 4021801 | 3685493 | 3357721 | 3857174 |
| <i>rover</i>          | 3913934 | 4439335 | 3740341 | 4413802 |
| <i>17</i>             | 3757103 | 4108886 | 5071916 | 5560644 |
| <i>gypsy3</i>         | 3682778 | 3554386 | 2830184 | 2884272 |
| <i>gypsy8</i>         | 3655179 | 3728606 | 2722929 | 3411123 |
| <i>micropia</i>       | 3559118 | 2417278 | 2013311 | 2119921 |
| <i>jockey</i>         | 3376139 | 3297674 | 3546945 | 4146091 |
| <i>mdg3</i>           | 3296156 | 1235716 | 2524741 | 1345156 |
| <i>1360</i>           | 3285512 | 5156759 | 5335734 | 6568159 |
| <i>jockey2</i>        | 2981839 | 1342190 | 1868498 | 1301785 |
| <i>NOF</i>            | 2918775 | 2971627 | 3143341 | 4836216 |
| <i>Doc2_element</i>   | 2688086 | 2651555 | 2132027 | 2253330 |

|                   |         |         |         |         |
|-------------------|---------|---------|---------|---------|
| <i>invader3</i>   | 2584627 | 2078870 | 1284719 | 2739027 |
| G6                | 2576079 | 627074  | 945758  | 379915  |
| <i>invader1</i>   | 2458468 | 1693207 | 1281924 | 1931929 |
| <i>diver</i>      | 2372031 | 1987955 | 1590040 | 1618401 |
| <i>R2_element</i> | 2260035 | 2483339 | 1794447 | 1517019 |
| <i>gypsy5</i>     | 2111953 | 2479300 | 2062569 | 2389746 |
| <i>accord</i>     | 2106928 | 1801875 | 3248478 | 2882497 |
| <i>hobo</i>       | 1954811 | 1809029 | 1713479 | 2094122 |
| <i>Oswaldo</i>    | 1877233 | 1627265 | 932764  | 1151843 |
| <i>lvk</i>        | 1845080 | 1550842 | 1819617 | 1687646 |
| <i>I-element</i>  | 1718477 | 1794646 | 2068711 | 1382814 |
| <i>diver2</i>     | 1550859 | 1815087 | 1296286 | 1787576 |
| <i>mst40</i>      | 1530674 | 1362018 | 1409514 | 1731263 |
| <i>accord2</i>    | 1527798 | 2096587 | 1512048 | 2010345 |
| <i>invader2</i>   | 1523485 | 1374037 | 1423788 | 1649748 |
| <i>suste</i>      | 1482810 | 1785831 | 1558074 | 1835264 |
| <i>ZAM</i>        | 1476973 | 1666397 | 1097342 | 1276684 |
| <i>S_element</i>  | 1444778 | 1610151 | 2033213 | 2184220 |
| <i>transib2</i>   | 1366037 | 1032032 | 2351520 | 1815126 |
| G5                | 1315973 | 1064191 | 274110  | 232997  |
| <i>Bari1</i>      | 1314823 | 1157956 | 874114  | 1132476 |
| <i>BS3</i>        | 1295669 | 1514826 | 1189674 | 1432758 |
| <i>Juan</i>       | 1283974 | 1530649 | 1264812 | 1231537 |
| <i>Dm88</i>       | 1261245 | 1345772 | 696032  | 1065214 |
| <i>TARTA</i>      | 1230226 | 1386330 | 2538630 | 1668275 |
| <i>Burdock</i>    | 1182124 | 1236358 | 1616024 | 1696223 |
| <i>copia</i>      | 1168058 | 1237437 | 919496  | 2176140 |
| <i>McClintock</i> | 1130508 | 1836263 | 1800464 | 2155603 |
| <i>Q_element</i>  | 1007549 | 1362920 | 876787  | 1298171 |
| <i>Rt1c</i>       | 921877  | 979467  | 516378  | 460132  |

|                     |        |        |         |        |
|---------------------|--------|--------|---------|--------|
| <i>Transpac</i>     | 664480 | 842077 | 1398779 | 919364 |
| <i>G4</i>           | 655365 | 668500 | 515109  | 503493 |
| <i>R1_2</i>         | 599844 | 565842 | 538270  | 427914 |
| <i>pogo</i>         | 550207 | 20837  | 64731   | 89295  |
| <i>INE_1</i>        | 536650 | 537523 | 411091  | 342295 |
| <i>Porto1</i>       | 444522 | 490967 | 325868  | 381115 |
| <i>G5A</i>          | 343242 | 364904 | 118977  | 103700 |
| <i>Fw2</i>          | 322497 | 326305 | 540390  | 437726 |
| <i>gypsy7</i>       | 317098 | 433764 | 258502  | 359194 |
| <i>gypsy11</i>      | 308232 | 318691 | 322509  | 308570 |
| <i>Helena</i>       | 269447 | 393630 | 418463  | 418829 |
| <i>Stalker3</i>     | 245588 | 282495 | 217954  | 282695 |
| <i>Tc1_2</i>        | 230163 | 308591 | 156323  | 336822 |
| <i>suffix</i>       | 225365 | 382428 | 109094  | 282544 |
| <i>looper1</i>      | 204936 | 131436 | 157977  | 113107 |
| <i>hopper</i>       | 199395 | 217477 | 232908  | 283920 |
| <i>Doc4_element</i> | 185309 | 169848 | 95216   | 85550  |
| <i>hopper2</i>      | 183781 | 255913 | 464215  | 500264 |
| <i>G3</i>           | 149500 | 157859 | 85833   | 113329 |
| <i>stellateHet</i>  | 127860 | 156267 | 178952  | 145553 |
| <i>Tirant</i>       | 115183 | 106368 | 173196  | 90752  |
| <i>stellate</i>     | 93590  | 118223 | 122122  | 85177  |
| <i>transib3</i>     | 90213  | 95001  | 14480   | 30864  |
| <i>FB</i>           | 82216  | 96167  | 90481   | 108577 |
| <i>gypsy9</i>       | 74008  | 50655  | 29568   | 58405  |
| <i>Fw3</i>          | 64433  | 72945  | 29862   | 48315  |
| <i>Tc1</i>          | 57170  | 88076  | 27440   | 44741  |
| <i>transib1</i>     | 50297  | 54878  | 48608   | 35706  |
| <i>HB</i>           | 44986  | 43360  | 26373   | 29927  |
| <i>frogger</i>      | 37533  | 48780  | 35868   | 19516  |

|                 |       |       |       |       |
|-----------------|-------|-------|-------|-------|
| <i>S2</i>       | 30233 | 65358 | 31936 | 38142 |
| <i>mariner2</i> | 17963 | 13494 | 7214  | 10729 |
| <i>Tc3</i>      | 8331  | 8130  | 4704  | 5988  |
| <i>Tom1</i>     | 8029  | 21705 | 20794 | 27279 |
| <i>G7</i>       | 7580  | 9506  | 5654  | 6052  |
| <i>Bari2</i>    | 7498  | 4743  | 1789  | 5988  |
| <i>transib4</i> | 6560  | 5420  | 12446 | 16633 |
| <i>invader5</i> | 3827  | 8130  | 7513  | 7386  |

**Supplementary Table 4. Mean length for piRNA lengths in adult life cycle**

Transposons further analyzed by qRT-PCR were in red.

|                       | 3 day | 15 day | 30 day | 45 day | 30 day compared to 3 day |
|-----------------------|-------|--------|--------|--------|--------------------------|
| <i>HB</i>             | 25.72 | 25.98  | 24.48  | 24.83  | -1.24                    |
| <i>transib4</i>       | 25.89 | 24.65  | 24.69  | 24.72  | -1.2                     |
| <i>gypsy9</i>         | 25.83 | 25.43  | 24.96  | 24.79  | -0.87                    |
| <i>S2</i>             | 25.91 | 25.91  | 25.12  | 25.67  | -0.79                    |
| <i>invader5</i>       | 25.88 | 25.92  | 25.16  | 25.75  | -0.72                    |
| <i>Tc1_2</i>          | 25.87 | 25.73  | 25.18  | 25.49  | -0.69                    |
| <i>mariner2</i>       | 25.61 | 26.25  | 24.93  | 24.47  | -0.68                    |
| <i>Tc1</i>            | 25.94 | 25.95  | 25.37  | 25.36  | -0.57                    |
| <i>invader4</i>       | 26.28 | 26.05  | 25.79  | 25.73  | -0.49                    |
| <i>I_element</i>      | 25.41 | 25.29  | 24.95  | 24.92  | -0.46                    |
| <i>G3</i>             | 25.61 | 25.59  | 25.15  | 24.63  | -0.46                    |
| <i>gypsy7</i>         | 25.94 | 25.87  | 25.52  | 25.62  | -0.42                    |
| <i>transib1</i>       | 25.64 | 25.75  | 25.24  | 25.04  | -0.4                     |
| <i>Tirant</i>         | 25.84 | 25.76  | 25.44  | 25.72  | -0.4                     |
| <i>Bari2</i>          | 25.5  | 24.63  | 25.1   | 24.29  | -0.4                     |
| <i>NOF</i>            | 25.51 | 25.42  | 25.14  | 25.21  | -0.37                    |
| <i>Q_element</i>      | 26.41 | 26.21  | 26.04  | 25.95  | -0.37                    |
| <i>1731</i>           | 25.62 | 25.49  | 25.26  | 25.3   | -0.36                    |
| <i>mdg3</i>           | 25.13 | 25.07  | 24.79  | 24.85  | -0.34                    |
| <i>Porto1</i>         | 25.28 | 25.07  | 24.94  | 24.63  | -0.34                    |
| <i>frogger</i>        | 25.85 | 26.36  | 25.51  | 25.47  | -0.34                    |
| <i>accord2</i>        | 25.66 | 25.48  | 25.33  | 25.17  | -0.33                    |
| <i>R2_element</i>     | 25.55 | 25.5   | 25.22  | 25.16  | -0.33                    |
| <i>Oswaldo</i>        | 25.74 | 25.67  | 25.41  | 25.32  | -0.33                    |
| <i>X_element</i>      | 25.12 | 25     | 24.8   | 24.78  | -0.32                    |
| <i>Quasimodo</i>      | 25.85 | 25.77  | 25.54  | 25.35  | -0.31                    |
| <i>Bari1</i>          | 25.32 | 25.34  | 25.01  | 25     | -0.31                    |
| <i>aurora_element</i> | 25.12 | 25.1   | 24.82  | 24.74  | -0.3                     |
| <i>gypsy11</i>        | 26.08 | 25.97  | 25.79  | 25.74  | -0.29                    |
| <i>gypsy5</i>         | 25.96 | 25.88  | 25.68  | 25.58  | -0.28                    |
| <i>ZAM</i>            | 25.83 | 25.74  | 25.55  | 25.41  | -0.28                    |
| <i>rover</i>          | 25.35 | 25.27  | 25.08  | 25.01  | -0.27                    |
| <i>Circe</i>          | 25.71 | 25.63  | 25.44  | 25.33  | -0.27                    |
| <i>Doc3_element</i>   | 25.45 | 25.33  | 25.18  | 25.14  | -0.27                    |
| <i>BS3</i>            | 25.71 | 25.68  | 25.44  | 25.47  | -0.27                    |
| <i>stellate</i>       | 25.65 | 25.59  | 25.38  | 25.29  | -0.27                    |
| <i>invader3</i>       | 25.67 | 25.58  | 25.41  | 25.36  | -0.26                    |
| <i>copia</i>          | 25.6  | 25.5   | 25.34  | 25.11  | -0.26                    |
| <i>F_element</i>      | 25.19 | 25.2   | 24.93  | 24.96  | -0.26                    |
| <i>Ivk</i>            | 25.51 | 25.46  | 25.25  | 25.19  | -0.26                    |
| <i>Rt1c</i>           | 25.6  | 25.65  | 25.34  | 25.39  | -0.26                    |
| <i>pogo</i>           | 25.33 | 25.44  | 25.07  | 25.12  | -0.26                    |

|                     |       |       |       |       |       |
|---------------------|-------|-------|-------|-------|-------|
| <i>G_element</i>    | 25.65 | 25.55 | 25.4  | 25.35 | -0.25 |
| <i>GATE</i>         | 25.19 | 25.12 | 24.94 | 24.94 | -0.25 |
| <i>rooA</i>         | 25.79 | 25.74 | 25.54 | 25.52 | -0.25 |
| <i>G5</i>           | 25.54 | 25.47 | 25.29 | 25.25 | -0.25 |
| <i>G2</i>           | 25.83 | 25.76 | 25.58 | 25.5  | -0.25 |
| <i>Fw2</i>          | 25.28 | 25.22 | 25.04 | 25.04 | -0.24 |
| <i>opus</i>         | 25.63 | 25.62 | 25.39 | 25.36 | -0.24 |
| <i>Dm88</i>         | 26.06 | 25.91 | 25.82 | 25.76 | -0.24 |
| <i>gypsy8</i>       | 25.7  | 25.65 | 25.46 | 25.42 | -0.24 |
| <i>suffix</i>       | 24.59 | 24.63 | 24.35 | 24.31 | -0.24 |
| <i>ldefix</i>       | 25.92 | 25.82 | 25.69 | 25.55 | -0.23 |
| <i>Rt1a</i>         | 25.59 | 25.56 | 25.36 | 25.39 | -0.23 |
| <i>Helena</i>       | 25.85 | 25.89 | 25.62 | 25.35 | -0.23 |
| <i>transib2</i>     | 25.72 | 25.66 | 25.49 | 25.48 | -0.23 |
| <i>gypsy3</i>       | 25.7  | 25.6  | 25.47 | 25.42 | -0.23 |
| <i>Doc2_element</i> | 25.46 | 25.44 | 25.23 | 25.22 | -0.23 |
| <i>R1_2</i>         | 25.23 | 25.29 | 25    | 25.1  | -0.23 |
| <i>suste</i>        | 25.22 | 25.1  | 24.99 | 24.84 | -0.23 |
| <i>Doc</i>          | 25.13 | 25.1  | 24.91 | 24.94 | -0.22 |
| <i>HMS_Beagle</i>   | 25.75 | 25.75 | 25.53 | 25.45 | -0.22 |
| <i>gypsy4</i>       | 25.93 | 25.85 | 25.71 | 25.58 | -0.22 |
| <i>baggins</i>      | 25.59 | 25.52 | 25.37 | 25.31 | -0.22 |
| <i>Stalker3</i>     | 26.25 | 26.39 | 26.03 | 25.97 | -0.22 |
| <i>gypsy12</i>      | 25.61 | 25.57 | 25.39 | 25.29 | -0.22 |
| <i>gtwin</i>        | 26.39 | 26.3  | 26.18 | 26.11 | -0.21 |
| <i>gypsy6</i>       | 24.85 | 24.76 | 24.64 | 24.64 | -0.21 |
| <i>BS</i>           | 25.59 | 25.57 | 25.38 | 25.4  | -0.21 |
| <i>hopper2</i>      | 24.86 | 24.47 | 24.65 | 24.72 | -0.21 |
| <i>HMS_Beagle</i>   | 25.93 | 25.88 | 25.72 | 25.64 | -0.21 |
| <i>1360</i>         | 25.63 | 25.62 | 25.42 | 25.51 | -0.21 |
| <i>TART_C_TAR</i>   | 25.35 | 25.27 | 25.15 | 25.2  | -0.2  |
| <i>Cr1a</i>         | 25.79 | 25.74 | 25.59 | 25.5  | -0.2  |
| <i>TAHRE</i>        | 25.43 | 25.36 | 25.23 | 25.16 | -0.2  |
| <i>412</i>          | 25.91 | 25.81 | 25.72 | 25.63 | -0.19 |
| <i>gypsy10</i>      | 26.01 | 25.86 | 25.82 | 25.76 | -0.19 |
| <i>roo</i>          | 25.71 | 25.62 | 25.52 | 25.51 | -0.19 |
| <i>hobo</i>         | 26.01 | 26.01 | 25.82 | 25.78 | -0.19 |
| <i>Transpac</i>     | 25.59 | 25.67 | 25.4  | 25.39 | -0.19 |
| <i>Juan</i>         | 26.13 | 26.11 | 25.94 | 25.97 | -0.19 |
| <i>R1A1_element</i> | 25.39 | 25.37 | 25.21 | 25.17 | -0.18 |
| <i>3S18</i>         | 25.49 | 25.51 | 25.31 | 25.27 | -0.18 |
| <i>McClintock</i>   | 25.57 | 25.47 | 25.39 | 25.26 | -0.18 |
| <i>Stalker</i>      | 26    | 25.98 | 25.83 | 25.81 | -0.17 |



|                     |       |       |       |       |       |
|---------------------|-------|-------|-------|-------|-------|
| <i>Stalker4</i>     | 25.96 | 25.94 | 25.79 | 25.74 | -0.17 |
| <i>accord</i>       | 25.23 | 25.24 | 25.07 | 25.07 | -0.16 |
| <i>gypsy</i>        | 25.87 | 25.84 | 25.71 | 25.65 | -0.16 |
| <i>invader1</i>     | 25.52 | 25.64 | 25.36 | 25.37 | -0.16 |
| 17                  | 25.31 | 25.3  | 25.15 | 25.2  | -0.16 |
| <i>FB</i>           | 23.27 | 24    | 23.11 | 22.9  | -0.16 |
| <i>S_element</i>    | 25.51 | 25.52 | 25.35 | 25.36 | -0.16 |
| <i>Tabor</i>        | 25.95 | 25.94 | 25.79 | 25.66 | -0.16 |
| <i>Stalker2</i>     | 26.09 | 26.06 | 25.93 | 25.91 | -0.16 |
| G6                  | 25.15 | 25.11 | 24.99 | 24.94 | -0.16 |
| TARTA               | 25.35 | 25.3  | 25.19 | 25.28 | -0.16 |
| <i>blood</i>        | 25.72 | 25.73 | 25.57 | 25.5  | -0.15 |
| <i>diver2</i>       | 25.31 | 25.32 | 25.16 | 25.19 | -0.15 |
| G4                  | 25.59 | 25.66 | 25.44 | 25.37 | -0.15 |
| <i>diver</i>        | 25.41 | 25.33 | 25.27 | 25.25 | -0.14 |
| <i>Max_element</i>  | 25.55 | 25.57 | 25.42 | 25.46 | -0.13 |
| <i>hopper</i>       | 25.07 | 25.21 | 24.95 | 25.03 | -0.12 |
| <i>jockey2</i>      | 24.51 | 24.54 | 24.39 | 24.34 | -0.12 |
| <i>gypsy2</i>       | 25.85 | 25.82 | 25.73 | 25.68 | -0.12 |
| <i>HeT_A</i>        | 25.24 | 25.24 | 25.12 | 25.05 | -0.12 |
| <i>mdg1</i>         | 25.88 | 25.85 | 25.76 | 25.65 | -0.12 |
| <i>invader2</i>     | 25.61 | 25.78 | 25.5  | 25.4  | -0.11 |
| <i>mst40</i>        | 25.37 | 25.38 | 25.26 | 25.23 | -0.11 |
| G5A                 | 25.26 | 25.3  | 25.16 | 25.01 | -0.1  |
| <i>springer</i>     | 25.81 | 25.81 | 25.71 | 25.7  | -0.1  |
| <i>micropia</i>     | 26.3  | 26.33 | 26.21 | 26.17 | -0.09 |
| <i>transib3</i>     | 25.45 | 25.58 | 25.36 | 25.54 | -0.09 |
| <i>jockey</i>       | 24.63 | 24.63 | 24.55 | 24.57 | -0.08 |
| <i>Burdock</i>      | 25.33 | 25.39 | 25.25 | 25.28 | -0.08 |
| <i>Rt1b</i>         | 25.43 | 25.48 | 25.35 | 25.33 | -0.08 |
| <i>Doc4_element</i> | 25.15 | 25.14 | 25.07 | 25.05 | -0.08 |
| 297                 | 25.75 | 25.78 | 25.68 | 25.66 | -0.07 |
| <i>flea</i>         | 25.53 | 25.64 | 25.47 | 25.37 | -0.06 |
| <i>Fw3</i>          | 25.26 | 25.53 | 25.2  | 25.09 | -0.06 |
| <i>INE_1</i>        | 25.37 | 25.4  | 25.33 | 25.26 | -0.04 |
| <i>stellateHet</i>  | 25.44 | 25.57 | 25.45 | 25.3  | 0.01  |
| <i>looper1</i>      | 24.89 | 24.74 | 24.94 | 24.43 | 0.05  |
| <i>Tom1</i>         | 25.1  | 25.69 | 25.44 | 26.29 | 0.34  |
| G7                  | 24.87 | 25.79 | 25.44 | 25.05 | 0.57  |

**Supplementary Table 5. piRNA abundance in adult life cycle**

Transposons further analyzed by qRT-PCR were in red.

|                       | 3 day    | 15 day   | 30 day   | 45 day   |
|-----------------------|----------|----------|----------|----------|
| <i>R1A1_element</i>   | 40149494 | 36291700 | 25497365 | 26969138 |
| GATE                  | 36200017 | 31304570 | 27711696 | 26748727 |
| <i>roo</i>            | 35675764 | 30643595 | 19848730 | 19264499 |
| <i>Rt1b</i>           | 34953281 | 26327271 | 22733196 | 22880241 |
| <i>Max_element</i>    | 27013660 | 19962756 | 15565090 | 15456889 |
| <i>gtwin</i>          | 20638963 | 24749484 | 17198903 | 18627402 |
| <i>X_element</i>      | 18882137 | 16030127 | 12404895 | 12860296 |
| <i>F_element</i>      | 17841155 | 13882554 | 10670632 | 10532304 |
| 412                   | 14199186 | 14886229 | 10912423 | 10447799 |
| <i>Rt1a</i>           | 12342207 | 9037441  | 7017629  | 7211254  |
| <i>Stalker</i>        | 11815536 | 11149429 | 8209559  | 8095500  |
| 297                   | 11733421 | 9899430  | 6068894  | 6503649  |
| <i>Stalker4</i>       | 11359090 | 10775434 | 7849227  | 7737890  |
| <i>Doc</i>            | 11155458 | 8622955  | 6514117  | 6600559  |
| <i>HeT_A</i>          | 10866145 | 8044428  | 5371141  | 5636340  |
| <i>gypsy12</i>        | 9858453  | 7255424  | 6741561  | 6355131  |
| <i>baggins</i>        | 9479222  | 9181496  | 6010960  | 5739030  |
| <i>Doc3_eleme</i>     | 9233522  | 6726210  | 4901132  | 4895609  |
| <i>G_element</i>      | 9038177  | 8347814  | 6189835  | 7051197  |
| G2                    | 8977548  | 8157545  | 6108594  | 7401294  |
| <i>invader4</i>       | 8688627  | 3194886  | 1776162  | 1926899  |
| <i>mdg1</i>           | 8629514  | 8354851  | 5872604  | 5587464  |
| <i>opus</i>           | 8509769  | 6055708  | 4776948  | 4665800  |
| <i>blood</i>          | 8216045  | 7447303  | 5678949  | 5567485  |
| <i>gypsy4</i>         | 8079424  | 7515554  | 5153740  | 5221108  |
| <i>Stalker2</i>       | 7968694  | 7702292  | 5928923  | 5765623  |
| <i>gypsy6</i>         | 7833386  | 7263663  | 5403867  | 5837567  |
| <i>Cr1a</i>           | 7643300  | 5730179  | 4289993  | 3950680  |
| <i>rooA</i>           | 6664184  | 4620345  | 3477339  | 3000546  |
| TART_C_TAR            | 6565761  | 4234011  | 3270942  | 3897139  |
| TAHRE                 | 6547458  | 5278724  | 3796539  | 3643353  |
| <i>springer</i>       | 6034446  | 5960137  | 4562510  | 4531777  |
| <i>gypsy</i>          | 5926067  | 5853801  | 4275651  | 4720695  |
| <i>gypsy2</i>         | 5804611  | 6312498  | 4713480  | 5169306  |
| <i>flea</i>           | 5804114  | 5333677  | 3398308  | 4003042  |
| 1731                  | 5335138  | 4799662  | 4028331  | 4385128  |
| <i>Circe</i>          | 5285349  | 4785171  | 4338762  | 4258726  |
| <i>jockey2</i>        | 5137398  | 4772287  | 4844968  | 5538225  |
| <i>jockey</i>         | 5116156  | 2888586  | 2899912  | 2867890  |
| <i>aurora_element</i> | 5039573  | 4201405  | 3254655  | 3301386  |
| <i>gypsy10</i>        | 4919490  | 5155103  | 3379989  | 3502320  |
| 17                    | 4842873  | 3911056  | 3204167  | 2638982  |

|                     |         |         |         |         |
|---------------------|---------|---------|---------|---------|
| <i>Tabor</i>        | 4818395 | 4853131 | 3187811 | 3236161 |
| <i>3S18</i>         | 4810801 | 4261124 | 2765247 | 2995868 |
| <i>rover</i>        | 4688795 | 4510215 | 3111821 | 3063232 |
| <i>BS</i>           | 4509666 | 4416808 | 3736840 | 3688545 |
| <i>1360</i>         | 4482970 | 4077240 | 2744281 | 3432990 |
| <i>mdg3</i>         | 4268598 | 4140842 | 2536220 | 2827198 |
| <i>ldefix</i>       | 4184704 | 3741405 | 2450034 | 2175237 |
| <i>HMS_Beagle</i>   | 4047172 | 3546749 | 2837921 | 2808631 |
| <i>gypsy8</i>       | 3985241 | 3041061 | 2038114 | 2048662 |
| <i>Quasimodo</i>    | 3761814 | 3697928 | 2655263 | 2786049 |
| <i>gypsy3</i>       | 3704236 | 3328920 | 2459980 | 2531901 |
| <i>Doc2_element</i> | 3276300 | 2463778 | 1897414 | 2188494 |
| <i>HMS_Beagle</i>   | 3088080 | 2841300 | 2384560 | 2617595 |
| <i>G6</i>           | 3050094 | 3265730 | 2347513 | 3420069 |
| <i>NOF</i>          | 3011242 | 2451218 | 2009031 | 1914479 |
| <i>diver</i>        | 2665323 | 2183802 | 1675724 | 2014422 |
| <i>lvk</i>          | 2641988 | 2253030 | 1864675 | 1844343 |
| <i>accord</i>       | 2620613 | 2343948 | 2083276 | 1670584 |
| <i>micropia</i>     | 2519827 | 2668472 | 2125307 | 2413575 |
| <i>hobo</i>         | 2492375 | 2353232 | 1447496 | 1641215 |
| <i>I_element</i>    | 2344597 | 1798880 | 1418673 | 1480244 |
| <i>R2_element</i>   | 2312717 | 2154713 | 1865020 | 1678777 |
| <i>invader3</i>     | 2118410 | 2351199 | 1768962 | 2523771 |
| <i>gypsy5</i>       | 2117436 | 2076401 | 1508718 | 1309772 |
| <i>BS3</i>          | 2076707 | 1500980 | 1145342 | 1227964 |
| <i>invader1</i>     | 1996632 | 1510904 | 1419024 | 1642850 |
| <i>S_element</i>    | 1983889 | 1749371 | 1314173 | 1384391 |
| <i>accord2</i>      | 1837048 | 1339040 | 1018886 | 1049342 |
| <i>Oswaldo</i>      | 1800284 | 1566766 | 956962  | 1081023 |
| <i>suste</i>        | 1769987 | 1427051 | 1164533 | 1274612 |
| <i>diver2</i>       | 1654800 | 1222300 | 1046871 | 975509  |
| <i>Bari1</i>        | 1617589 | 1696346 | 1393285 | 1651368 |
| <i>ZAM</i>          | 1497284 | 1476513 | 913261  | 1016746 |
| <i>invader2</i>     | 1494532 | 1013052 | 752028  | 703943  |
| <i>G5</i>           | 1488462 | 1549040 | 1310582 | 1323043 |
| <i>TARTA</i>        | 1448778 | 819524  | 624228  | 741940  |
| <i>transib2</i>     | 1446683 | 1409786 | 962421  | 1171414 |
| <i>Juan</i>         | 1412748 | 869102  | 699604  | 761760  |
| <i>McClintock</i>   | 1382263 | 1186945 | 840793  | 920253  |
| <i>mst40</i>        | 1312908 | 1090813 | 828324  | 901922  |
| <i>Burdock</i>      | 1170489 | 854586  | 610722  | 749044  |
| <i>Dm88</i>         | 1054366 | 781726  | 546047  | 589883  |
| <i>Rt1c</i>         | 1042622 | 936303  | 707642  | 689381  |

|                    |         |        |        |        |
|--------------------|---------|--------|--------|--------|
| <i>Q_element</i>   | 1022428 | 849717 | 591619 | 533779 |
| <i>copia</i>       | 862532  | 817383 | 582655 | 695158 |
| <i>G4</i>          | 697355  | 734439 | 529479 | 499899 |
| <i>INE_1</i>       | 652425  | 520421 | 372078 | 335836 |
| <i>Transpac</i>    | 636517  | 549715 | 332734 | 388516 |
| <i>R1_2</i>        | 603864  | 547275 | 414498 | 483696 |
| <i>Porto1</i>      | 584686  | 496188 | 398384 | 381970 |
| <i>pogo</i>        | 576576  | 583754 | 451750 | 496305 |
| <i>G5A</i>         | 399482  | 401396 | 284512 | 335612 |
| <i>gypsy7</i>      | 380036  | 239860 | 176674 | 180249 |
| <i>Helena</i>      | 374873  | 353301 | 292051 | 296274 |
| <i>Fw2</i>         | 359787  | 222923 | 181493 | 185351 |
| <i>hopper2</i>     | 317303  | 221750 | 160005 | 177218 |
| <i>gypsy11</i>     | 285920  | 300027 | 231100 | 197246 |
| <i>Tc1_2</i>       | 267403  | 223833 | 146688 | 154295 |
| <i>suffix</i>      | 244809  | 186652 | 163388 | 131056 |
| <i>looper1</i>     | 237418  | 318165 | 197189 | 290165 |
| <i>hopper</i>      | 229359  | 177266 | 124378 | 122331 |
| <i>Stalker3</i>    | 227080  | 234181 | 170115 | 184483 |
| <i>Doc4_eleme</i>  | 210917  | 170387 | 158771 | 160762 |
| <i>stellateHet</i> | 183820  | 126164 | 80324  | 77346  |
| <i>stellate</i>    | 126277  | 91664  | 66487  | 64054  |
| <i>G3</i>          | 125407  | 94663  | 99224  | 62350  |
| <i>Fw3</i>         | 106822  | 92368  | 67660  | 91478  |
| <i>Tirant</i>      | 100437  | 114981 | 78011  | 87151  |
| <i>Tc1</i>         | 90072   | 93740  | 76416  | 77920  |
| <i>gypsy9</i>      | 86561   | 64218  | 50454  | 54897  |
| <i>FB</i>          | 72769   | 61616  | 51875  | 43906  |
| <i>transib3</i>    | 67171   | 54944  | 41652  | 55638  |
| <i>frogger</i>     | 60667   | 58249  | 23945  | 39532  |
| <i>transib1</i>    | 60025   | 43633  | 40111  | 63124  |
| <i>HB</i>          | 45792   | 24157  | 19818  | 17715  |
| <i>S2</i>          | 39590   | 32801  | 26868  | 22301  |
| <i>mariner2</i>    | 15780   | 11236  | 3130   | 7380   |
| <i>G7</i>          | 14206   | 6097   | 4821   | 4739   |
| <i>Tom1</i>        | 12933   | 8989   | 3969   | 2138   |
| <i>invader5</i>    | 12239   | 6742   | 7095   | 4887   |
| <i>transib4</i>    | 11757   | 9551   | 14054  | 10996  |
| <i>Bari2</i>       | 9901    | 5337   | 4392   | 4276   |

## Supplementary Materials and Methods

### Fly genetics

To make *Nbr*<sup>cas9</sup> flies, we co-injected two sgRNAs (100ng/ul; target sequences: 5'-GGCGCGGGAGAGCTTACGCT-3' and 5'-GGAGTTAAAAAAGCAGCGCTT-3') with Cas9 mRNA (1µg/µl) into fly embryo. To make *HenI*<sup>cas9</sup> flies, we co-injected two U6a-sgRNA-short plasmids (250ng/ul; targets sequence: 5'-CTTAACCAGCGTTAATCCAC-3'; 5'-GGATATGCTGGAGATGCAGT-3') into fly embryo expressing *nano*-Cas9 (TH00788. N). To make *piwi*<sup>cas9</sup> flies, we co-injected two U6a-sgRNA-short plasmids (250ng/ul; targets sequence: 5'-CGACGTTGCTCACACAATC-3'; 5'-TGAGCTCTGCCGAGTGACT-3') into fly embryo expressing *nano*-Cas9 (TH00788. N). To make *Nbr*<sup>KI-Myc</sup> flies, we injected one sgRNA (250ng/ul; target sequences: 5'-GGCTCTTGCGTGCCATTTCTCA-3') and an oligo template with Myc tag sequence (5'-GGTTCTCCATGTTCTCCTCGTCCGACTCAAAGCCGGCGGGTATTGCGTTGTACATGTGCTCTTGCGTGCCAGATCCTCTTCAGAGATGAGTTTCTGTTCCATTCTCACGGGTTTCCCGTGCCACTGCAGAGCGAAGCAAGTGCAATTGCCAATTGCAAATGCAATTGACGGTAA-3'). To screen flies carrying mutant alleles, we used single fly PCR assay. Single fly was homogenized in 50µl squashing buffer (10 mM Tris buffer [pH 8.0], 25 mM NaCl, 1 mM EDTA, 200 µg/ml Proteinase K ), then incubated at 37°C for 30 min followed by inactivation at 85°C for 10 min. For PCR amplification, 1 µl of DNA extract was used as template. PCR primers were as follows: *Nbr*<sup>cas9</sup> (Forward: 5'-CCTGGATTCTGAATGGATGC-3', Reverse: 5'-TCACTTAACATGGGCACCCCG-3'), *HenI*<sup>cas9</sup> (Forward: 5'-GTGGACATCGACAAGTCCTTGCTC-3', Reverse: 5'-GCAATAGGCATATTACAAGTGTC-3'), *piwi*<sup>cas9</sup> (Forward: 5'-CGTTGGATTCATATCGTGTGCTGAG-3', Reverse: 5'-CAGGTCAAGAATCGGACGGACTAGC-3'), and *Nbr*<sup>KI-Myc</sup> (Forward: 5'-GAACAGAACTCATCTCTGAAGAGG-3', Reverse: 5'-TAAAGGCTATCATGCTGGTG-3'). To generate *Nbr* pUAST constructs, RT-PCR amplification was conducted using RNA from whole flies, with primers (Forward: 5'-ATG TATCCAGTTGGACAACAG-3', Reverse: 5'-TCACTTATCGTCGTCATCCTTGTAATCCTTAACATGGGCACCCCG-3').

### Small RNA northern

Oligo probes were used to make probes. Oligos used for miR-34-5p (5'-GATAATACGACTCACTATAGGGAGA-3'/5'-AAAAAATGGCAGTGTGGTTAGCTGGTTGTGTCTCCCTATAGTGAGTCGTATTATC-3'), miR-219-5p (5'-GATAATACGACTCACTATAGGGAGA-3'/5'-AAAAAATGATTGTCCAAACGCAATTCTTCTCCCTATAGTGAGTCGTATTATC-3'), miR-275-3p (5'-GATAATACGACTCACTATAGGGAGA-3'/5'-AAAAAATCAGGTACCTGAAGTAGCGCGCTCTCCCTATAGTGAGTCGTATTATC-3'), miR-283-5p (5'-GATAATACGACTCACTATAGGGAGA-3'/5'-AAAAAAAATATCAGCTGGTAATTCTGGTCTCCCTATAGTGAGTCGTATTATC-3'), AT-chX-1 (5'-GATAATACGACTCACTATAGGGAGA-3'/5'-AAAAAATGTTTCATCGTTAGACGGCTCGGGCGTCTCCCTATAGTGAGTCGTATTATC-3'), and 2S rRNA (5'-GATAATACGACTCACTATAGGGAGA-3'/5'-TGCTTGGACTACATATGGTTGAGGGTTGTATCTCCCTATAGTGAGTCGTATTATC-3').

## Molecular biology

To clone full-length cDNA, RT-PCR primers were as follows: *Nbr*-Flag (Forward: 5'-ATGGCAGCAAGAGCCACATG-3', Reverse: 5'-TCACTTATCGTCGTCATCCTTGTAATCCTTAACATGGGCACCCCG-3'), *Ha-piwi* (Forward: 5'-ATGTACCCATACGATGTTCCAGATTACGCTGCTGATGATCAGGGACGT-3', Reverse: 5'-TTATAGATAATAAACTTCTTTTC-3'), *Ha-aub* (Forward: 5'-ATGTACCCATACGATGTTCCAGATTACGCTAATTTACCACCAAACCCTG-3', Reverse: 5'-TTACAAAAAGTACAATTGATTC-3'), *Ha-ago3* (Forward: 5'-ATGTACCCATACGATGTTCCAGATTACGCTTCTGGAAGAGGAAATTTG-3', Reverse: 5'-TTAAAGATAAAATAGTTTTTCAG-3'). qRT-PCR primers were as follows: *rp49* (5'-CCGCTTCAAGGGACAGTATCTG-3'/5'-ATCTCGCCGCAGTAAACGC-3'), *piwi* (5'-CGTCCACTTAACGAAGATGATTC-3'/5'-CCTCGAGAGCTTCTCTCTCTT-3'), *aub* (5'-GTCCCTCGATAGAGAAATCCAGT-3'/5'-CGTGAATACACCAAATCCGTTAT-3'), *Ago3* (5'-AAATTTGATCGCAAGCAGTTTGA-3'/5'-AAACGTCGCAGCATAGCATTTAA-3'), *Nbr* (5'-GAAGACGTGCAGCTACTTGCATT-3'/5'-CTTCAGAATGAGCTCCAGCAGAG-3'), *Hen1* (5'-TAATCGAGCACGTTTACGACGAT-3'/5'-GTGACCACTCGAACTTGTGATCC-3'), *412* (5'-CAACAGCTCATCACCACCAGACA-3'/5'-AGATTGGGTCGTGTTGAAGCAGT-3'), *accord* (5'-ACAATCCACCAACAGCAACA-3'/5'-AAAAGCCAAAATGTCCGGTTG-3'), *accord2* (5'-GAGGTCGTTGAATAGACTGCCCG-3'/5'-GGTCGCCGATGCCCTATTACAAT-3'), *blood* (5'-AGAGGGGAGGTGTAGTATGTGCA-3'/5'-GCTTATGCGCATATATGGCCAGC-3'), *diver* (5'-GGCACCACATAGACACATCG-3'/5'-GTGGTTTGCATAGCCAGGAT-3'), *diver2* (5'-TGCAGTTGATTCTTGGCAGAGAC-3'/5'-GGCTTCCAACAGAGTCTCAAGG-3'), *gtwin* (5'-TTCGCACAAGCGATGATAAG-3'/5'-GATTGTTGTACGGCGACCTT-3'), *gypsy* (5'-GGGTACAGAGTTTGCAGGTGGAA-3'/5'-TCTCCAGGCCACATACTCGTCTT-3'), *gypsy10* (5'-GCATACCAGATTCCACTCAGCC-3'/5'-CTGGGTGACGATTGGTGTTTTGC-3'), *gypsy5* (5'-TGCGAGCTTATCAGACGTTAGGG-3'/5'-GGATAGGCAAATGTCCTGAGGGG-3'), *gypsy6* (5'-GACAAGGGCATAACCGATACTGTGGA-3'/5'-AATGATTCTGTTCCGGACTTCCGTCT-3'), *het-A* (5'-CGCGCGGAACCCATCTTCAGA-3'/5'-CGCCGCAGTCGTTTGGTGAGT-3'), *hopper* (5'-TAAGTATGGCTGCAAGATCCCGC-3'/5'-ATTTGAGTGGCCCAAGACAGCAA-3'), *idifix* (5'-ATTCACCGCGTTTCATACCG-3'/5'-TCTGACTCTCGCGTTGTCTT-3'), *I-element* (5'-GTCGTGCCTCTCAGTCTAAAGCC-3'/5'-GAGCCCGATTAGCGGTATTGTT-3'), *invader1* (5'-GTACCGTTTTTGAGCCCGTA-3'/5'-AACTACGTTGCCATTCTGG-3'), *invader3* (5'-CAGCTATCGTTGGTGGATGCAGA-3'/5'-GGTTTCCGTTGCTGTTGTTCTCG-3'), *Max* (5'-TCTAGCCAGTCGAGGCGTAT-3'/5'-TGGAAGAGTGTCGCTTTGTG-3'), *mdgl* (5'-AACAGAAACGCCAGCAACAGC-3'/5'-CGTTCATGTCCGTTGTGAT-3'), *NOF* (5'-GTGAAACCCGATGAACAATGCGG-3'/5'-CTTCCTTCTCCACAATGCAGCT-3'), *RIAI* (5'-AATTCCCAGCTGTGCTAGA-3'/5'-GTCTCAAGGCACCTTTCAGC-3'), *rt1a* (5'-CCACACAGACTGAGGCAGAA-3'/5'-ACGCATAACTTTCCGGTTTG-3'), *ZAM* (5'-ACTTGACCTGGATACACTCACAAC-3'/5'-GAGTATTACGGCGACTAGGGATAC-3').
